# Supplementary material for: Disseminated Histoplasmosis and Presumptive CNS Toxoplasmosis-Associated Immune Reconstitution Inflammatory Syndrome in a Patient with HIV/AIDS: A Case Report
Source: Research Square preprint supplement (doi:10.21203/rs.3.rs-5050317/v1), 2024-11-21
Supplement: Supplementary file 1 [file 1d2878b661877d9ac6d2bb2f.docx]

Appendix:


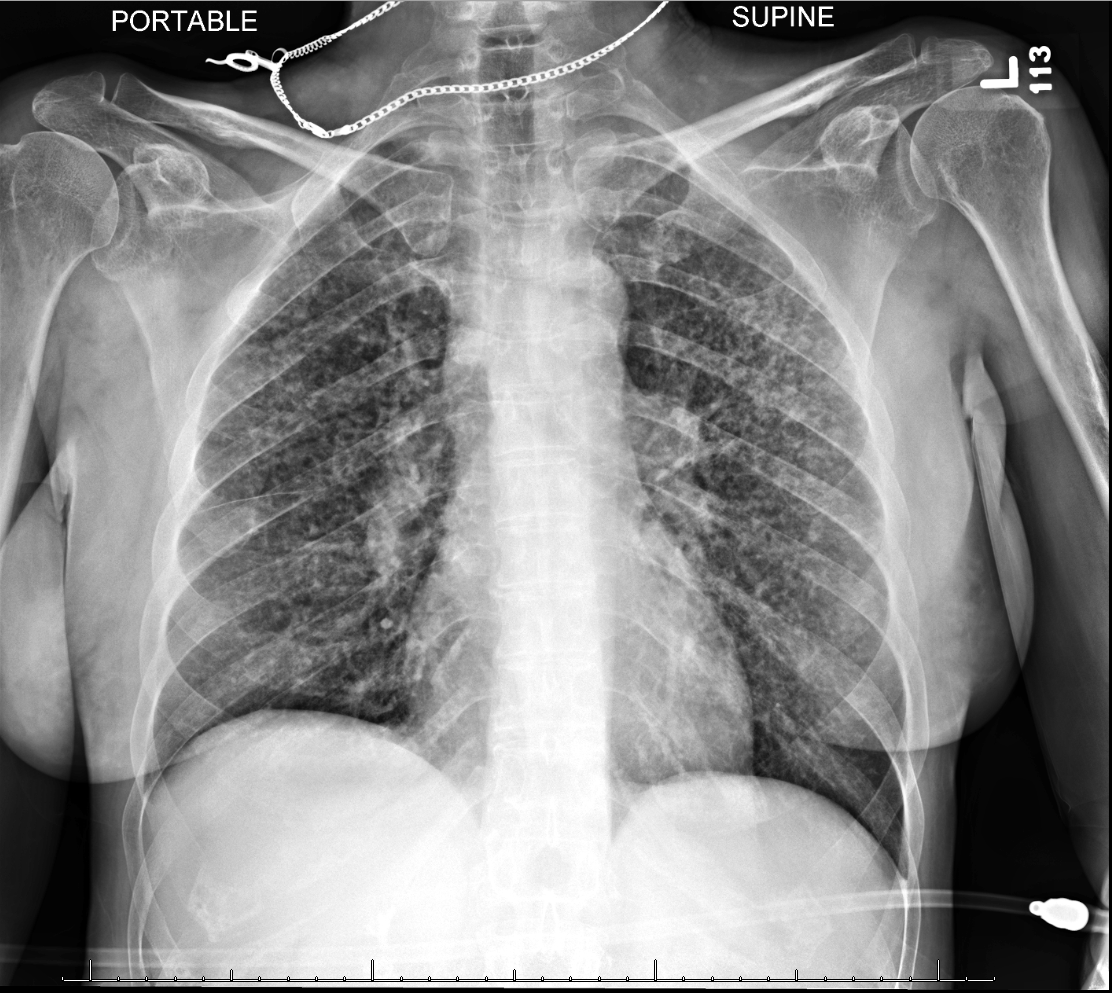


Image 1: Chest X Ray showing bilateral diffuse reticulonodular opacities in both lungs, concerning for atypical multifocal pneumonia, neoplasm or interstitial lung disease.


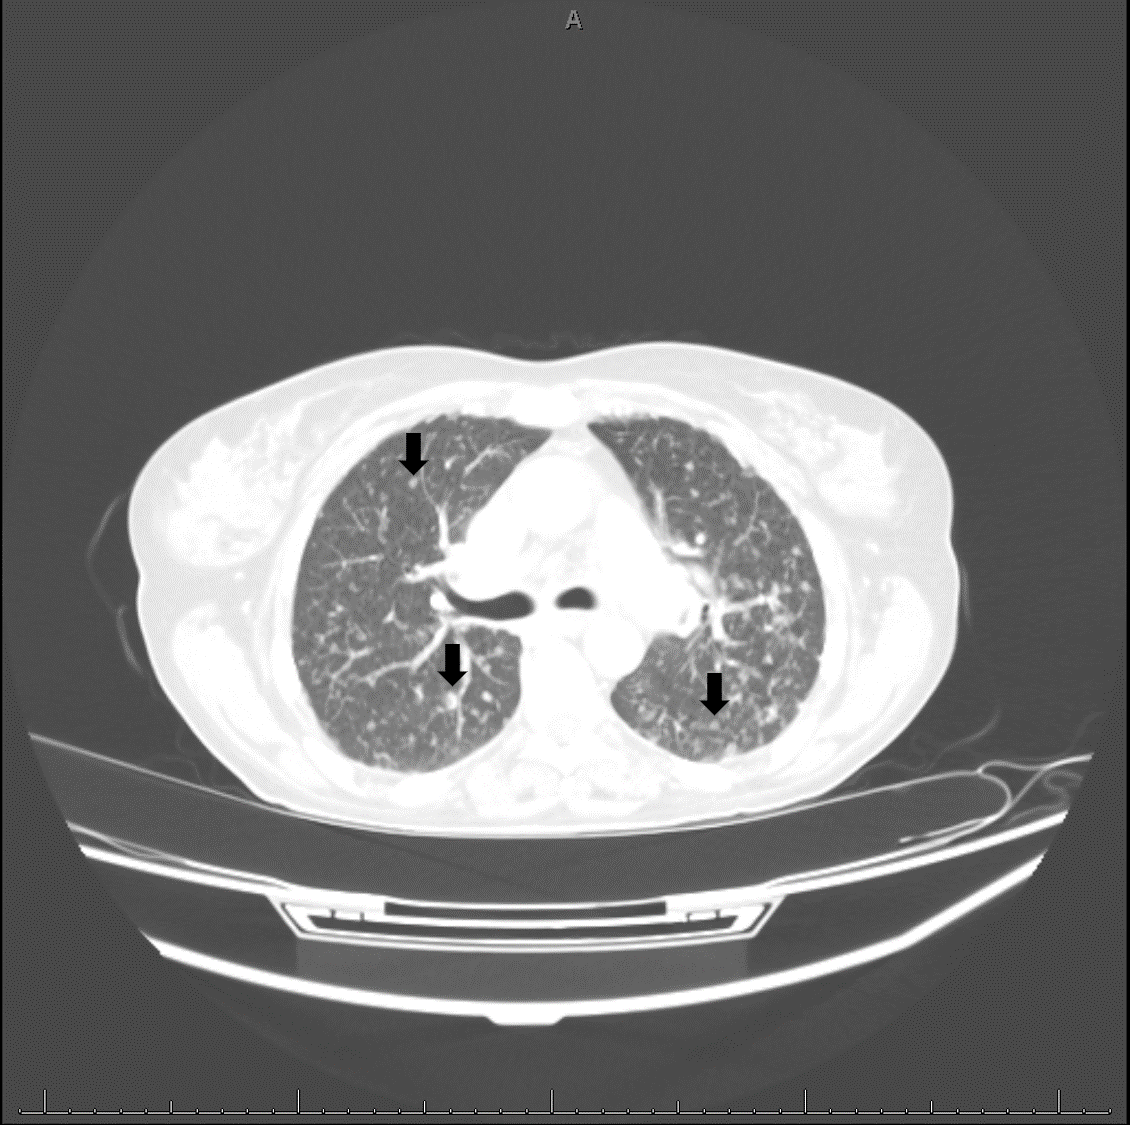


Image 2

Chest CT showing Innumerable scattered subcentimeter nodules throughout the bilateral lungs with associated mediastinal lymphadenopathy and biapical emphysematous changes


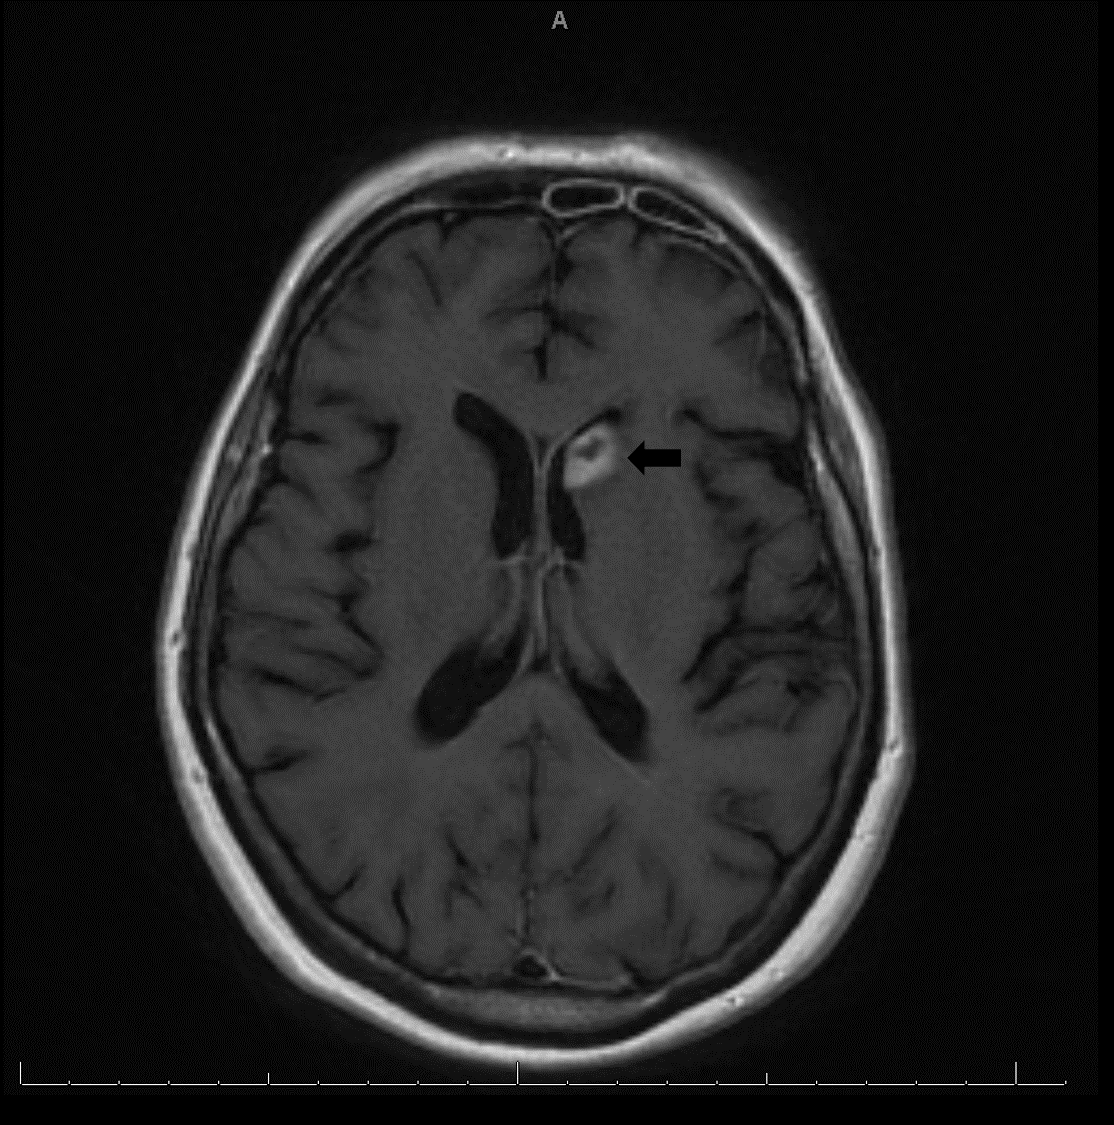


Image 3

T1-weighted magnetic resonance (MR) image with contrast medium showing a 1.6 cm rim enhancing lesion in the left caudate with surrounding edema and probable hemorrhagic components.


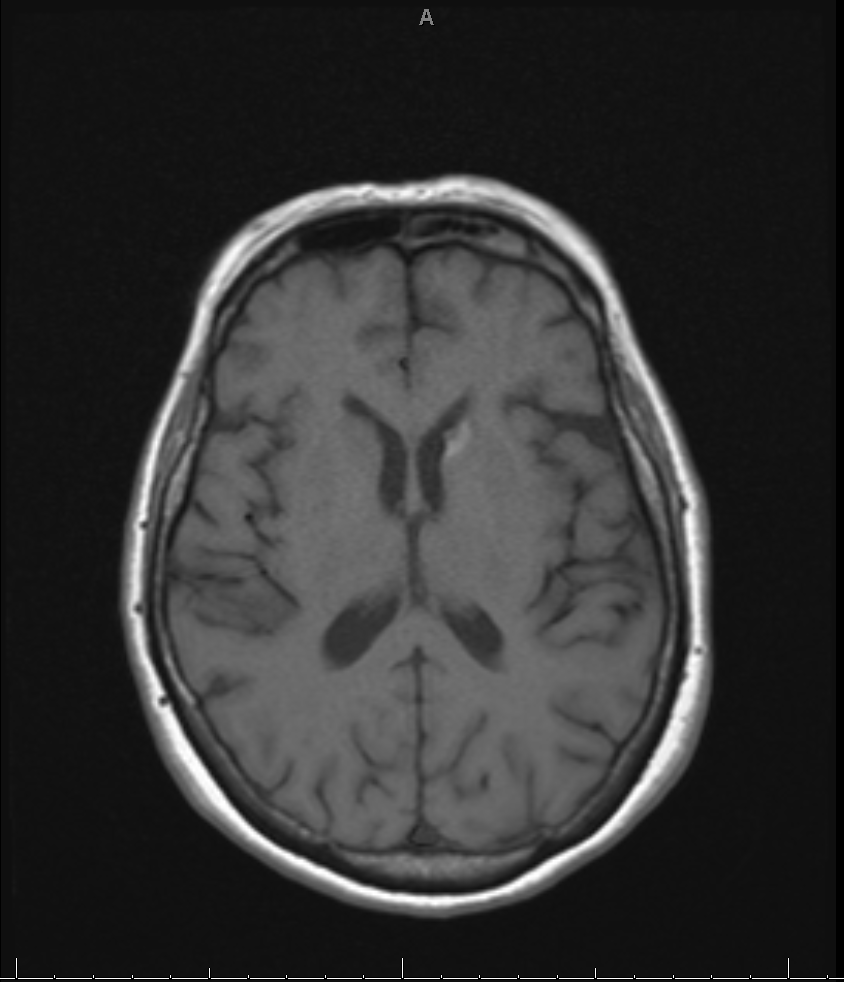

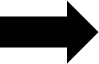


Image 4

The image shows a reduced mass to 0.7 cm after 2 weeks of therapy for toxoplasmosis.
